# Supplementary material
Source: Elsevier journal article supplement (https://www.sciencedirect.com/science/article/pii/S2530016417301210)
Supplement: mmc1 [file S2530016417301210:mmc1.docx]

**Tablas**

**Tabla S1. Citocinas producidas en los adipocitos y macrófagos**

|  | **Adipocito** | | **Macrófago** | |
| --- | --- | --- | --- | --- |
|  | Aumentadas  (pro-inflamatorias) | Reducidas  (anti-inflamatorias) | Aumentadas  (pro-inflamatorias) | Reducidas  (anti-inflamatorias) |
| Citocina | Leptina, visfatina, IL-6, MCP-1 , PAI-1, Proteína C reactiva, proteína amiloide sérica A, haptoglobina | Adiponectina | TNF-α, IL-6, MCP-1, resistina, IL1β, IL-15 | IL-10 |
| Factor | NF-κB, Factor inhibidor de leucemia, VEGF, MIF, HIF-1α | PPARγ, MIF | MIF |  |
|  |  |  |  |  |

Tanto el tejido adiposo como los macrófagos son capaces de secretar varias citoquinas que intervienen en el proceso de lipoinflamación evidenciado en obesidad. Interleuquina 6 (IL-6). Interleuquina 1 β (IL1β). Interleuquina 15 (IL-15). Interleuquina 10 (IL-10). Proteína quimiotáctica de monocitos (MCP-1). Inhibidor del activador del plasminógeno-1 (PAI-1). Factor nuclear potenciador de las cadenas ligeras kappa de las células B activadas (NF-κB). Factor de crecimiento endotelial vascular (VEGF). Factor de inhibición de migración de macrófagos (MIF). Factor inducido por hipoxia 1α (HIF-1α). Ver detalles en el texto.

**Tabla S2. Funciones de los receptores de adenosina en el adipocito**

| **Receptor** | **Gen** | **Función** | **Localización** |
| --- | --- | --- | --- |
| A1 | *ADORA1* | - Inhibe la lipólisis. - Reduce actividad de adenilato ciclasa. - Promueve la insulino-sensibilidad. - Reduce los ácidos grasos libres en plasma. | Adipocito[36](#_ENREF_36),[37](#_ENREF_37),[43](#_ENREF_43),[45](#_ENREF_45),[46](#_ENREF_46) |
| A2A | *ADORA2A* | - Promueve el aumento de termogénesis por medio de la actividad de UCP1. | Adipocito[47-50](#_ENREF_47) |
| - Fomenta la producción de IL-10 | Macrófago[64-66](#_ENREF_64),[68](#_ENREF_68) |
| A2B | *ADORA2B* | - Inhibe la adipogénesis. - Estimula KLF4 | Adipocito[51-54](#_ENREF_51) |
| - Reduce PPARγ y C/EBP-α. - Inhibe expresión de IL-6. | Macrófago[70](#_ENREF_70) |
| A3 | *ADORA3* | - Podría reducir la expresión de TNF-α. | Adipocito[57-59](#_ENREF_57) |

Ver detalles en el texto.
